# Supplementary material
Source: PubMed Central journal article supplement (PMC4210082)

Figure 1A

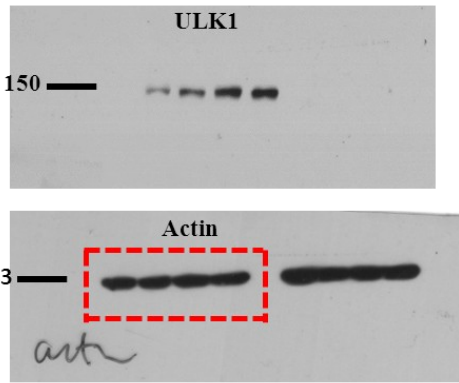

Figure 1C

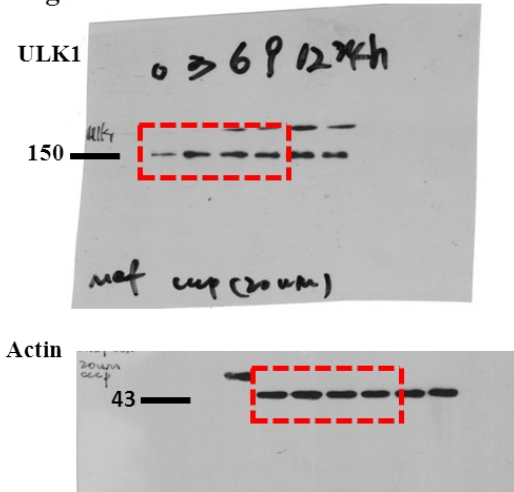

Figure 1G

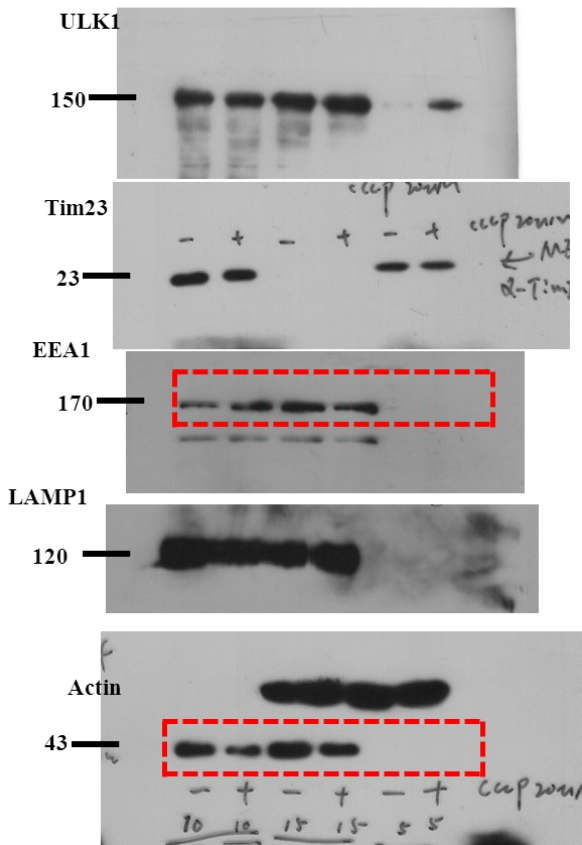

Figure 1F

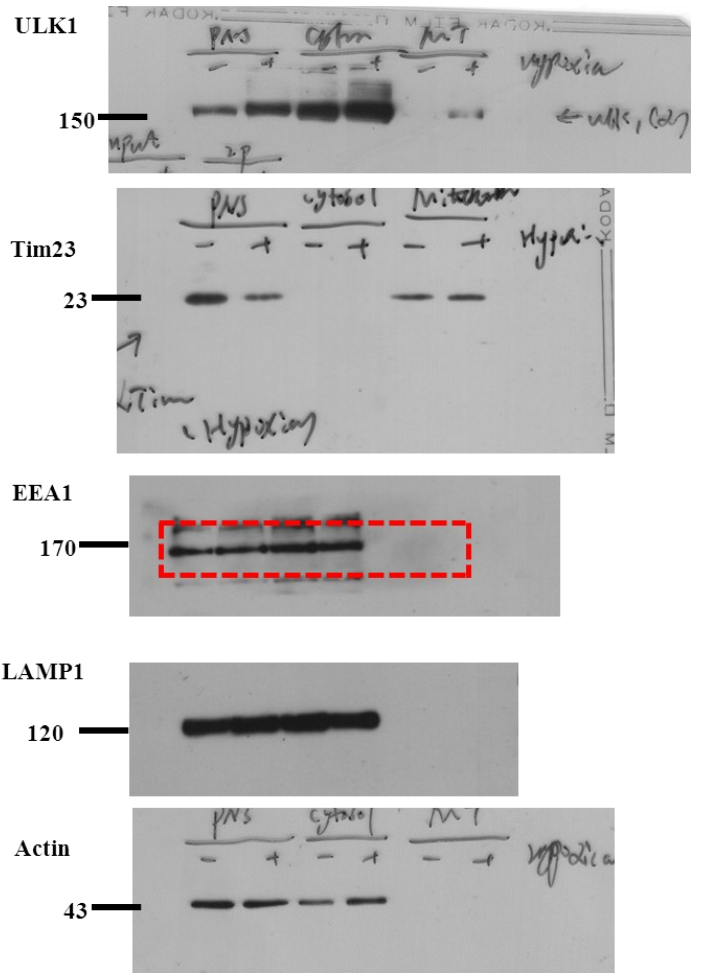

Figure 2A

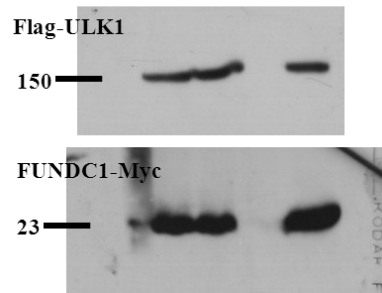

Figure 2B

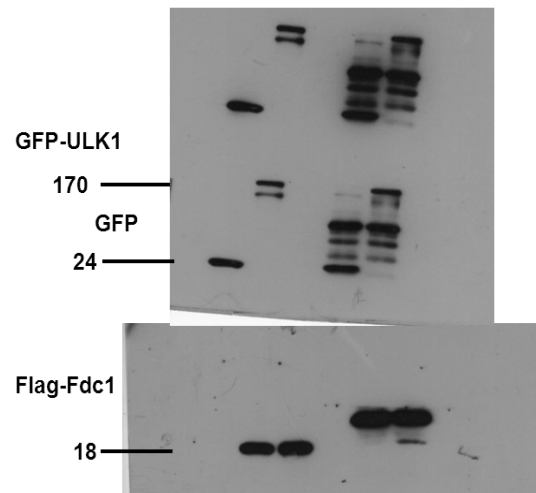

Figure 2C

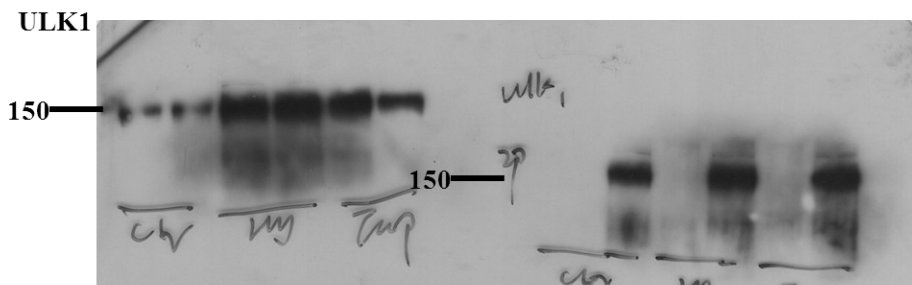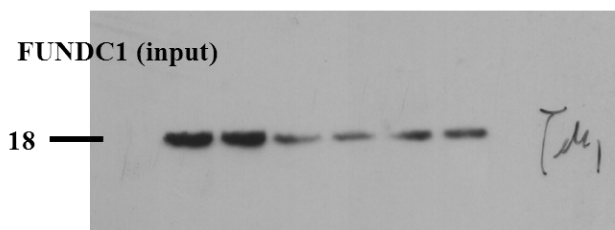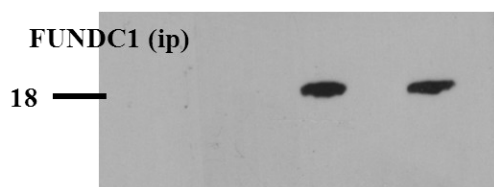

Figure 2D

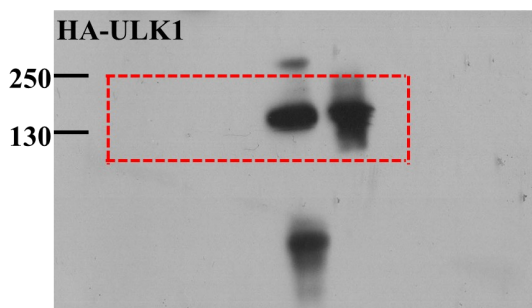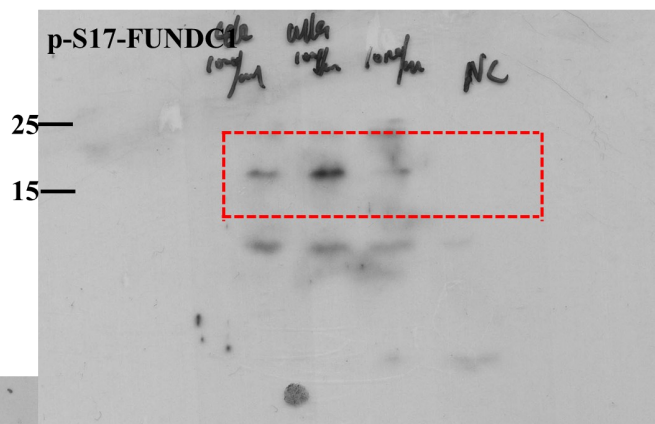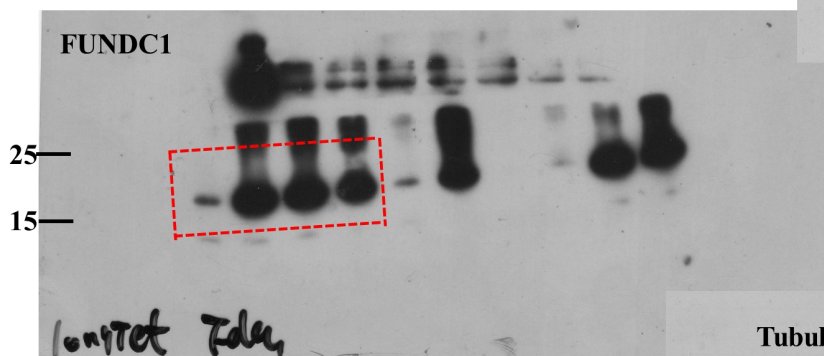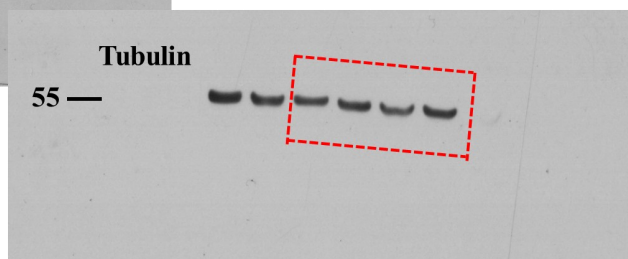

Figure 2E

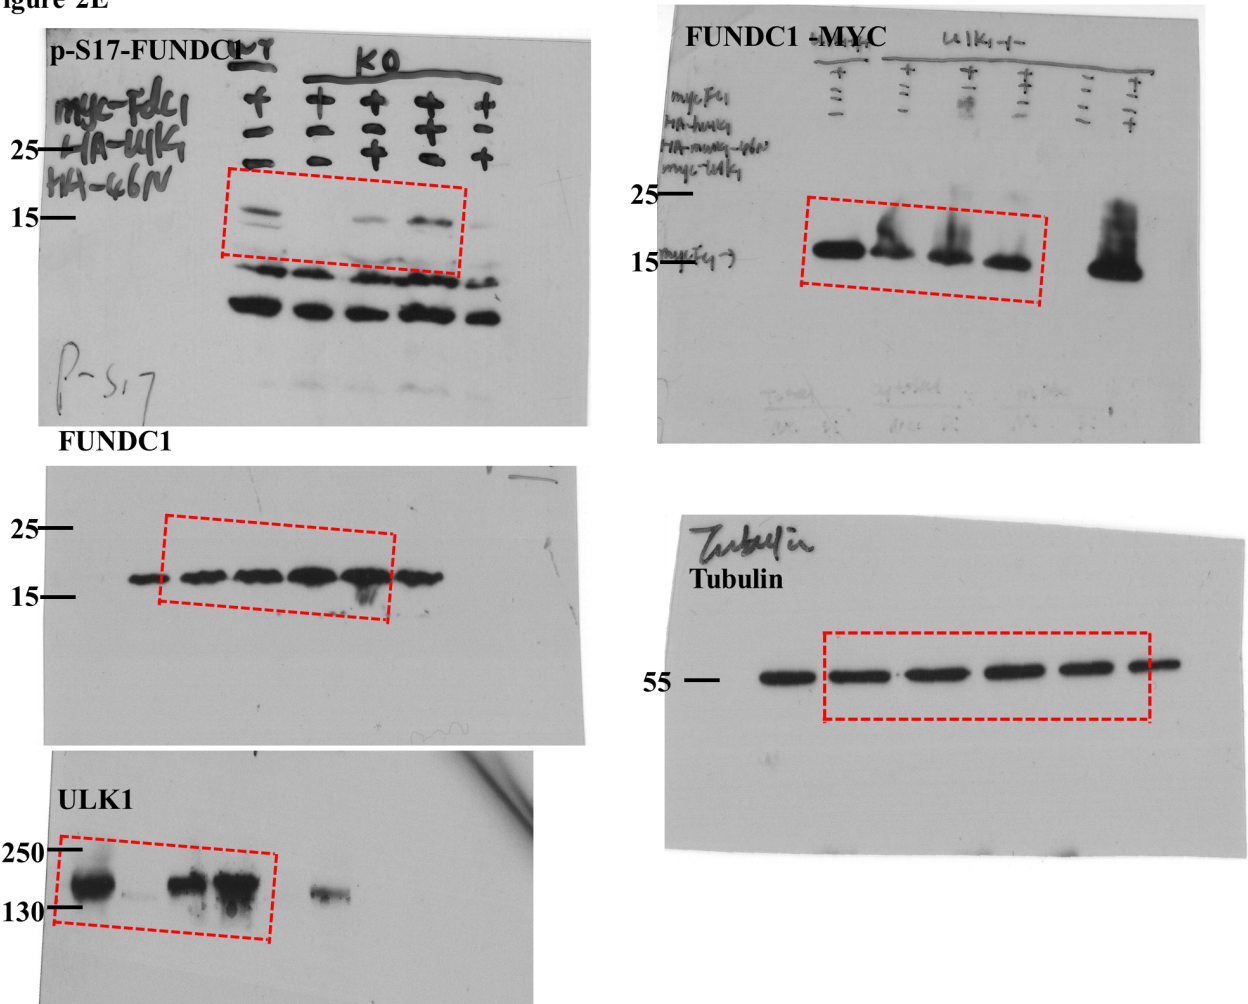

Figure 2F

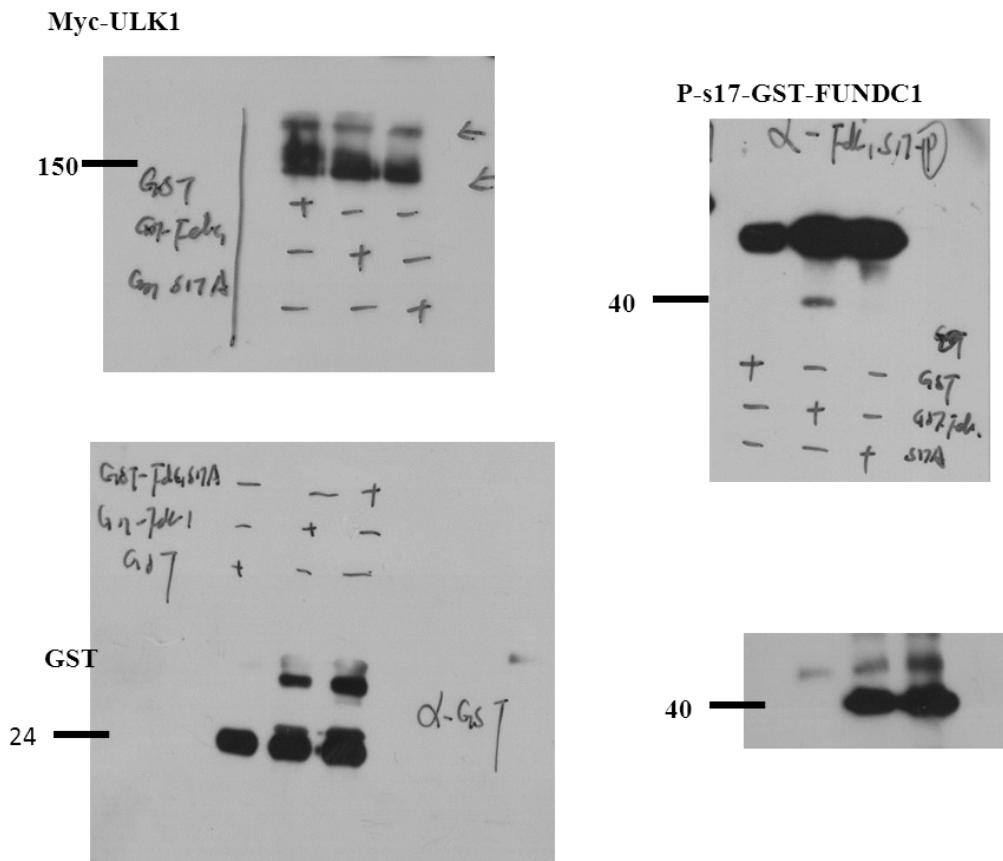

Figure 2G

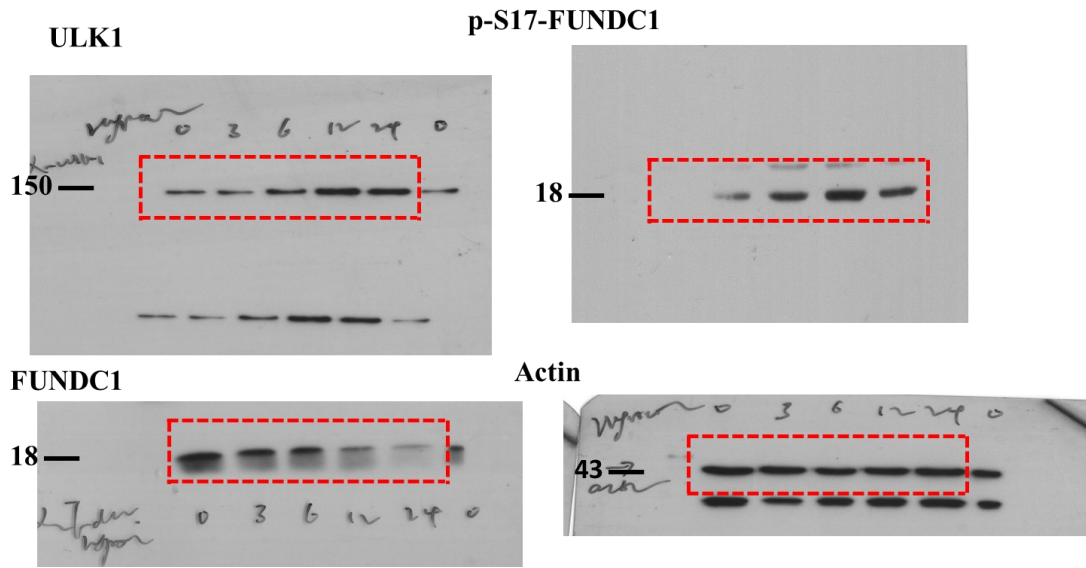

Figure 2H

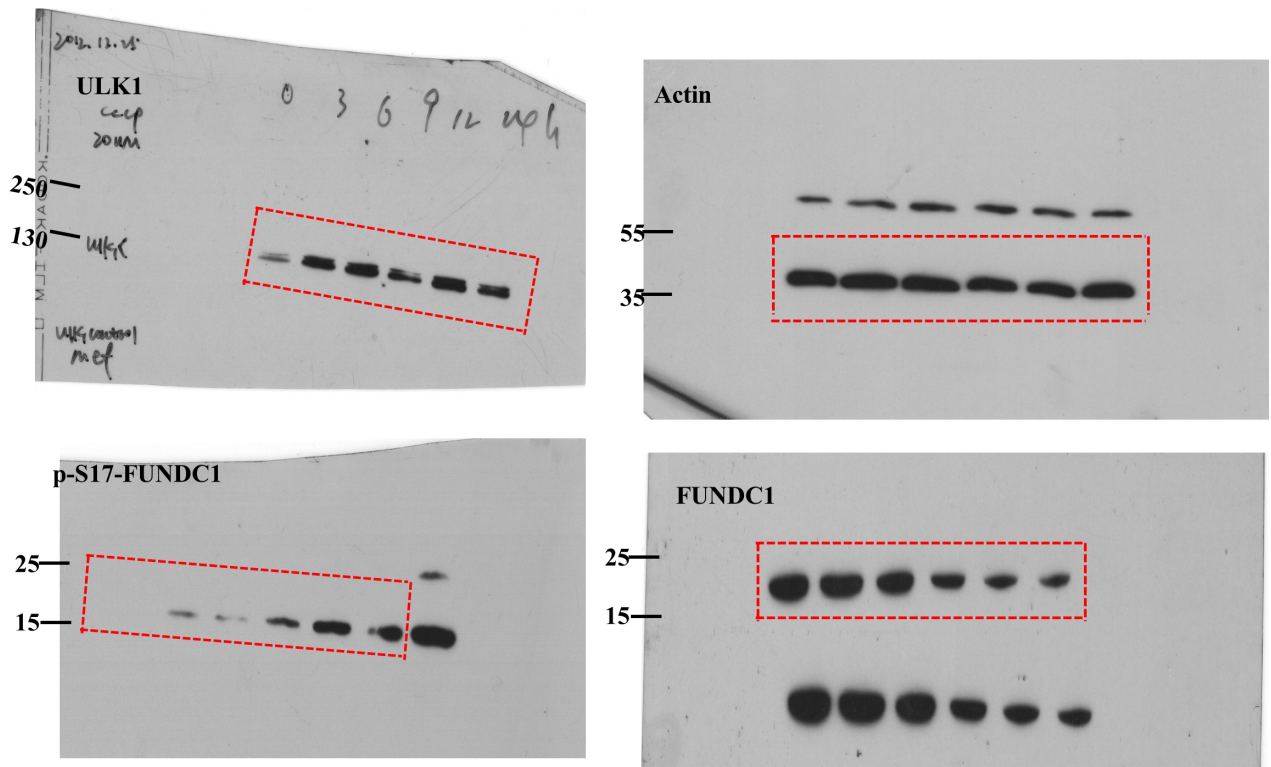

**Figure 2I**

**FLAG-ULK1**

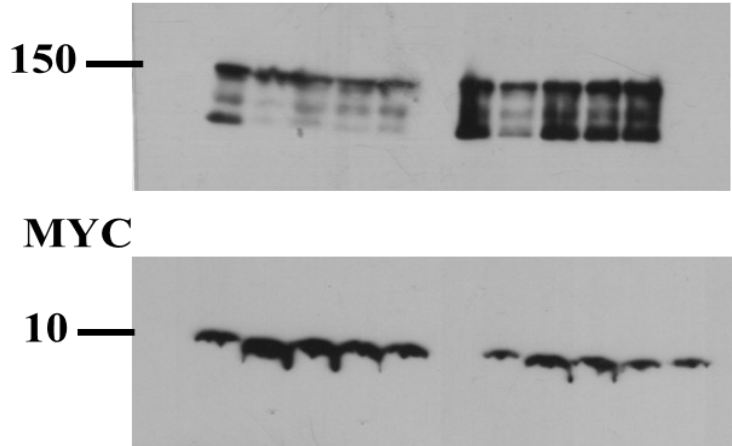

**Figure 2J**

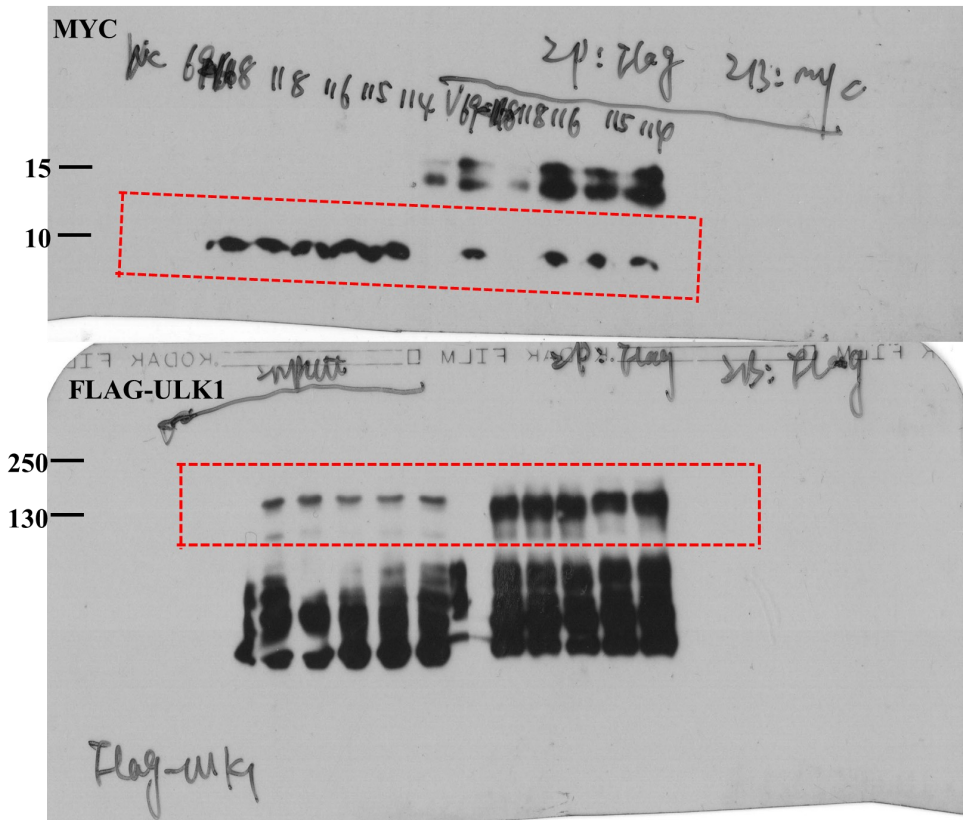

Figure 2K

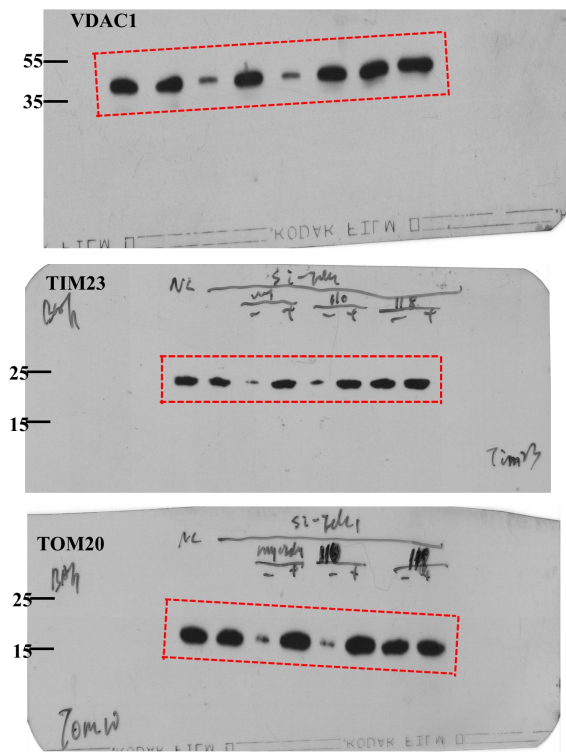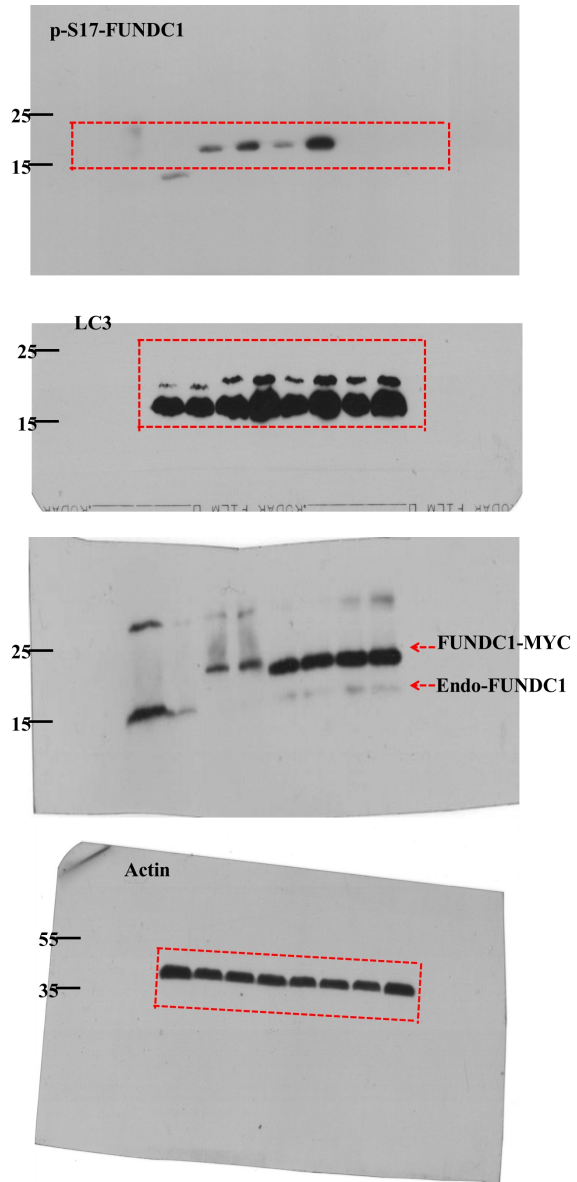

Figure 3A

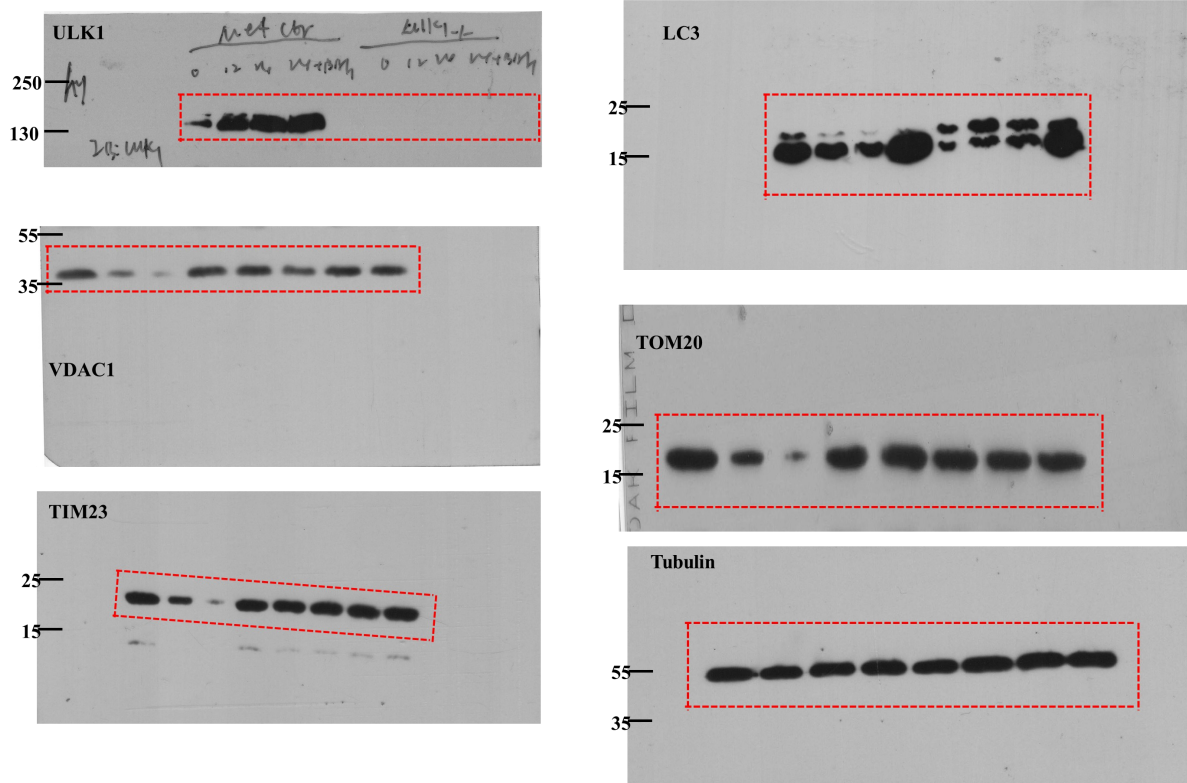

Supplement: embr0015-0566-sd18.pdf [file embr0015-0566-sd18.pdf]
