# Supplementary material
Source: PubMed Central journal article supplement (PMC4210082)
Supplement: embr0015-0566-sd3.pdf [file embr0015-0566-sd3.pdf]

**Figure S3. Specificity test of anti-FUNDC1 (phospho-Ser-17) antibody**

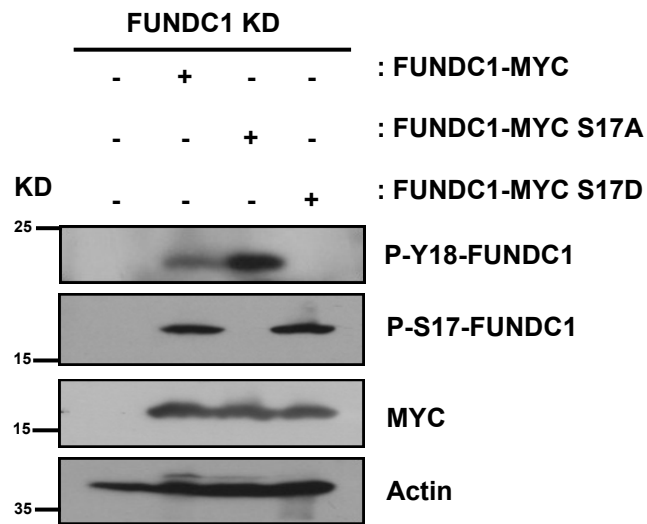

**Figure S3. Specificity test of anti-FUNDC1 (phosphor-Ser-17) antibody**

FUNDC1 *Knockdown* cells were transfected with FUNDC1-Myc, FUNDC1-Myc S17A or FUNDC1-Myc S17D. Cell lysates were immunoblotted to detect Myc, p-S17-FUNDC1, p-Y18-FUNDC1, and Actin antibodies. All results are from 3 independent experiments.
