# Supplementary material
Source: PubMed Central journal article supplement (PMC4210082)
Supplement: embr0015-0566-sd4.pdf [file embr0015-0566-sd4.pdf]

**Figure S4. ULK1 K46N still has a weak kinase activity**

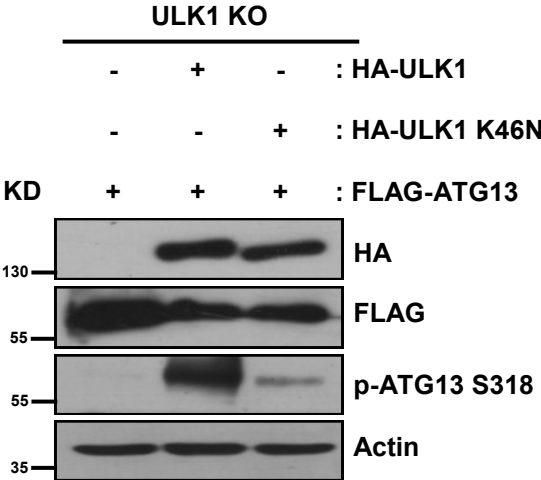

**Figure S4. ULK1 K46N still has a weak kinase activity**

ULK1 (-/-) cells were co-transfected with HA-ULK1 and FLAG-ATG13 or HA-ULK1 (K46N) and FLAG-ATG13. After 24 h transfection, cells were lysed for immunoblotting with anti-HA, FLAG, p-ATG13 S318, and Actin antibodies. All results are from 3 independent experiments.
