# Supplementary material
Source: PubMed Central journal article supplement (PMC4210082)
Supplement: embr0015-0566-sd5.pdf [file embr0015-0566-sd5.pdf]

**Figure S5. Ser-17 at FUNDC1 is phosphorylated under hypoxia- but not starvation-induced autophagy**

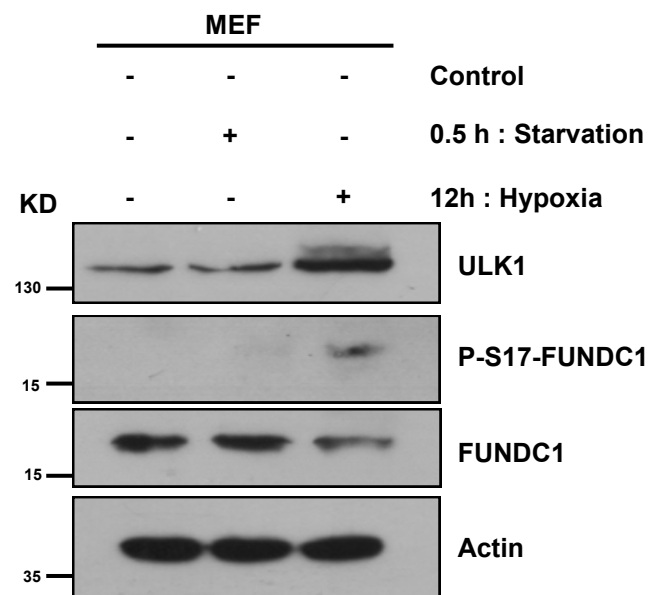

**Figure S5. Ser-17 at FUNDC1 is phosphorylated under hypoxia- but not starvation-induced autophagy**

MEFs were cultured under starvation (EBSS) for 0.5 h or hypoxic (1% O<sub>2</sub>) condition for 12 h. The cell lysates was immunoblotted to detect ULK1, p-S17-FUNDC1, FUNDC1, and Actin antibodies. All results are from 3 independent experiments.
