# Supplementary material
Source: PubMed Central journal article supplement (PMC4210082)
Supplement: embr0015-0566-sd7.pdf [file embr0015-0566-sd7.pdf]

**Figure S7. AA 109-118 in FUNDC1 is required for its interaction with ULK1**

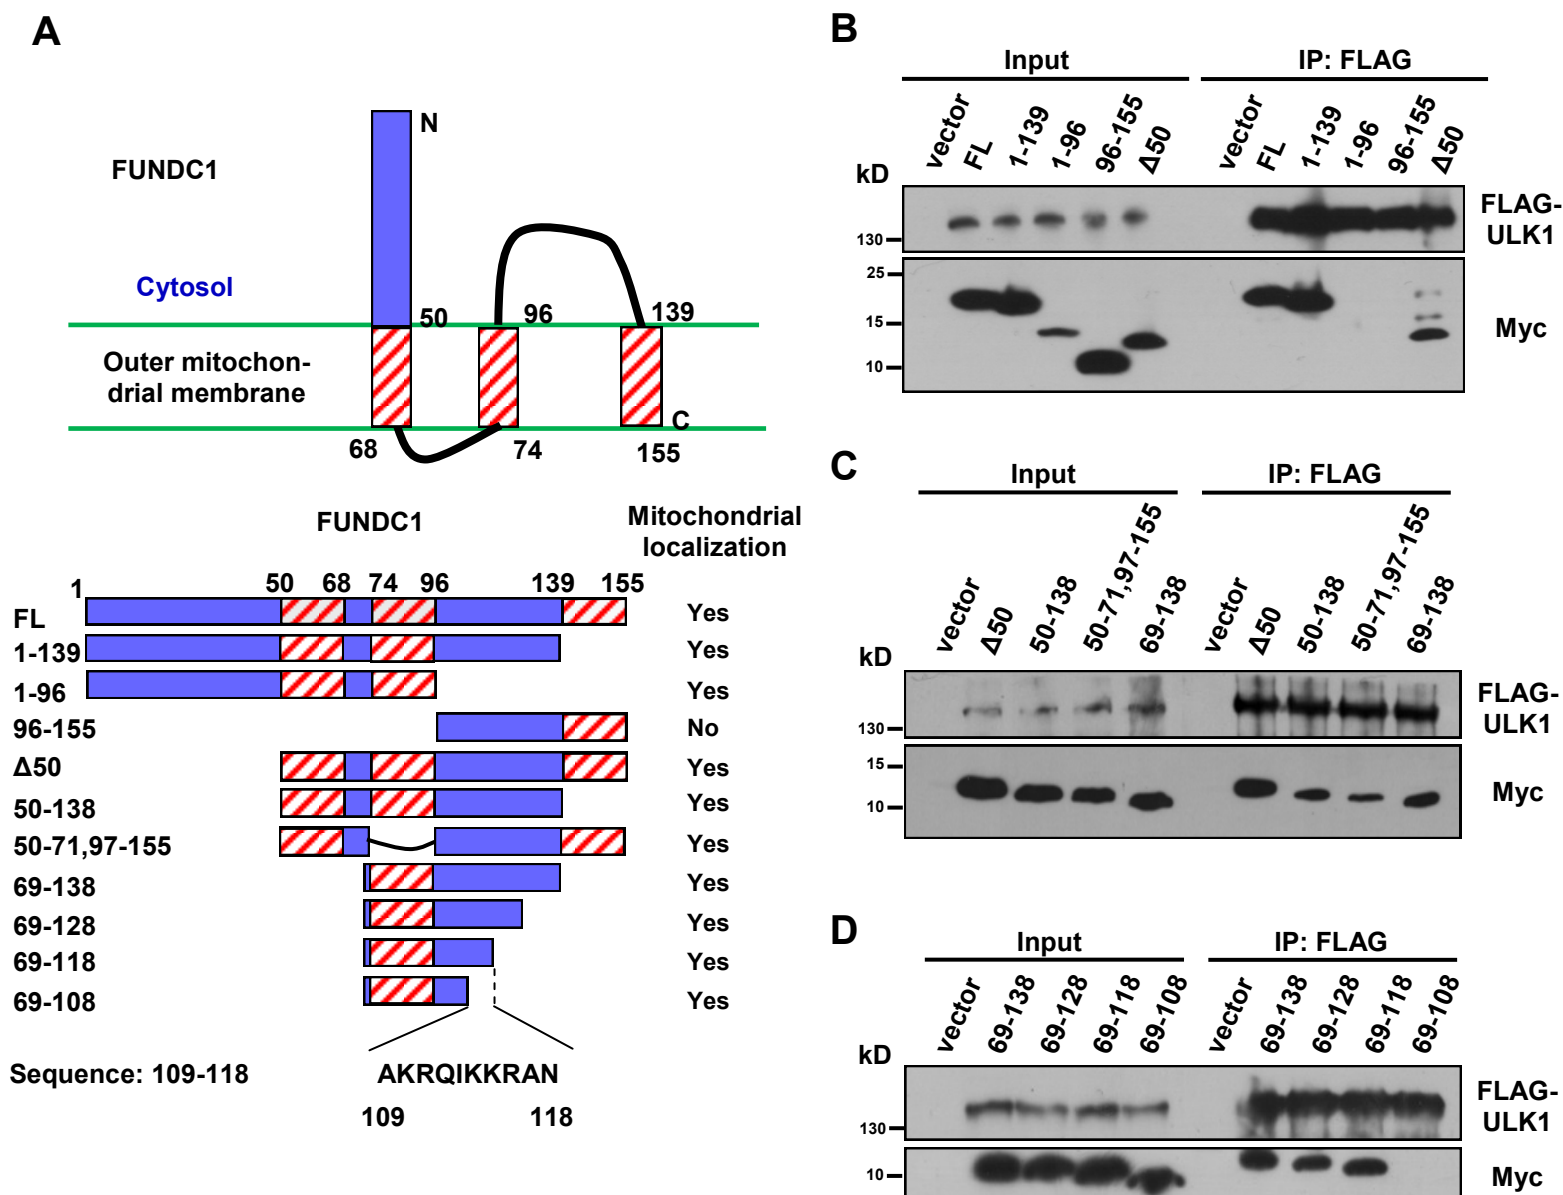

**Figure S7. AA 109-118 in FUNDC1 is required for its interaction with ULK1**

(A) Schematic representation of the full-length wild-type FUNDC1 protein (FL) and its truncations and mutants. FUNDC1 has three transmembrane domains (top). Different constructs of FUNDC1 are indicated (bottom). All results are from 3–4 independent experiments.

(B)-(D) The key region which can abolish the ULK1 and FUNDC1 interaction was identified. HeLa cells were co-transfected with Flag-ULK1 and the indicated constructs. After 24 h transfection, cells were lysed for immunoprecipitation by anti-Flag antibody. All results are from 3–4 independent experiments.
