# Supplementary material
Source: PubMed Central journal article supplement (PMC4210082)
Supplement: embr0015-0566-sd8.pdf [file embr0015-0566-sd8.pdf]

**Figure S8. FUNDC1 lost its mitochondrial localization upon simultaneously deletion of the first and the second transmembrane domains and FUNDC1 109-118 is essential for FUNDC1-ULK1 colocalization**

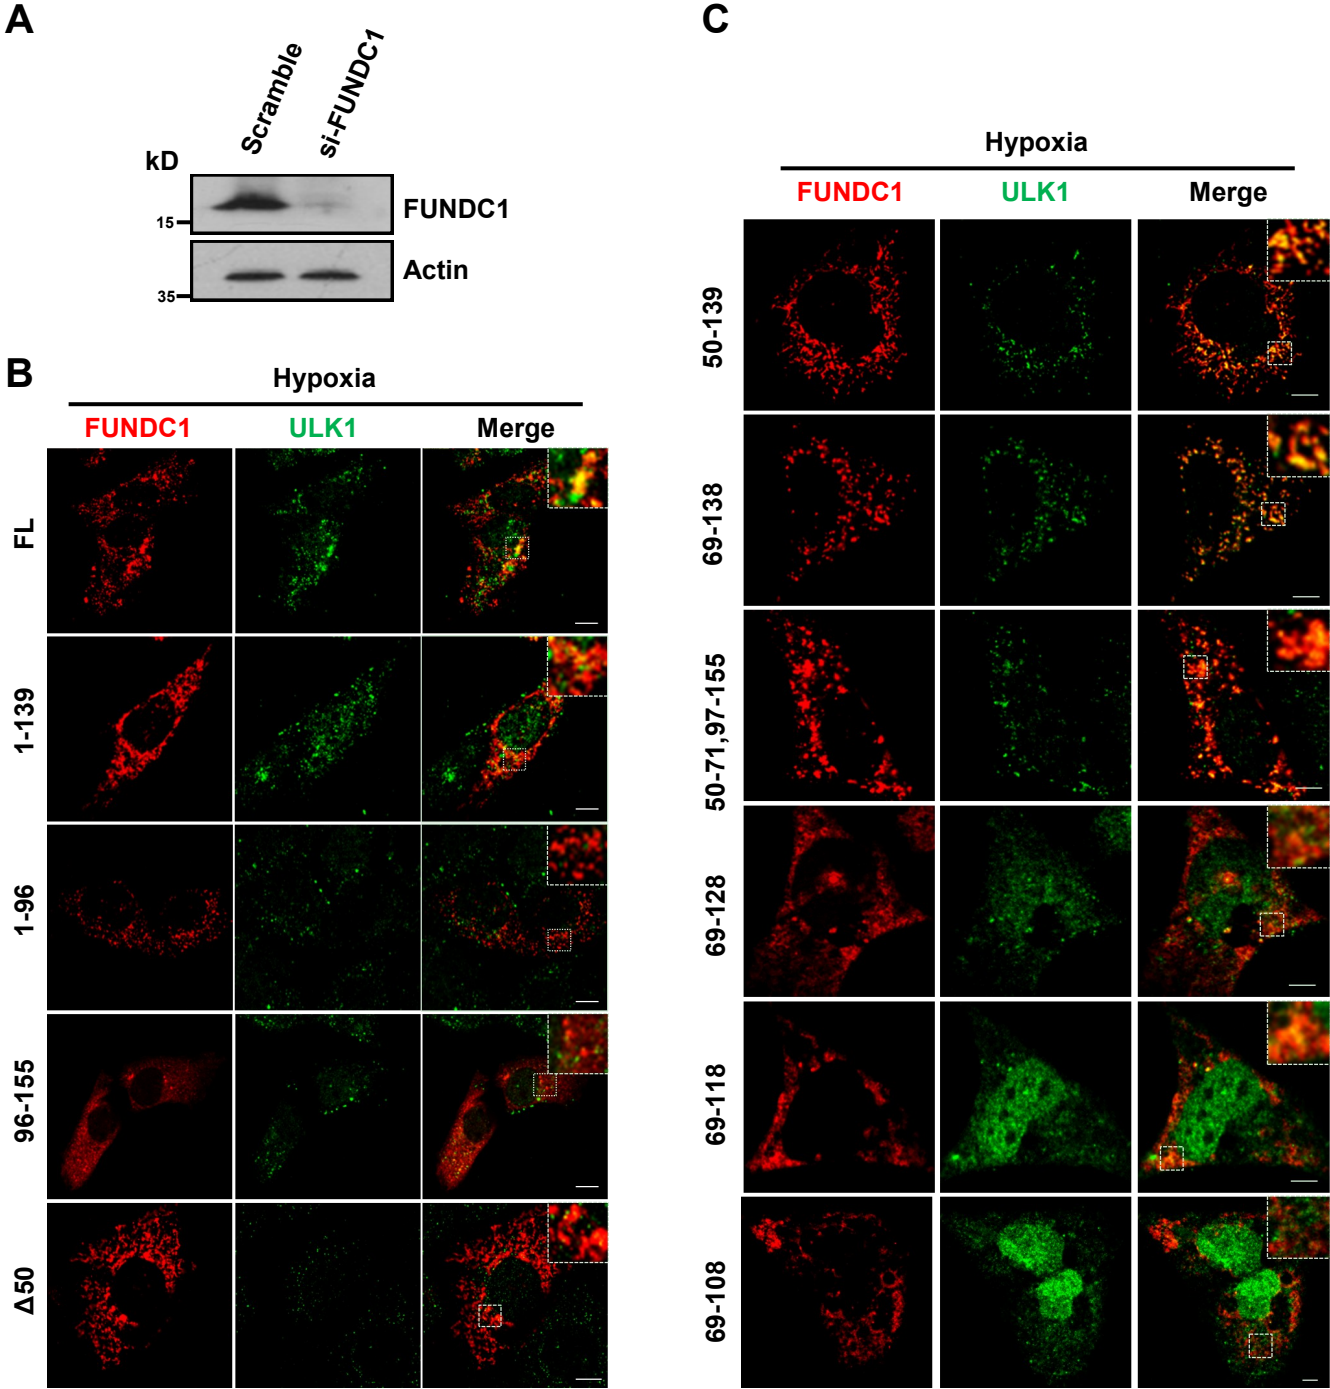

**Figure S8. FUNDC1 lost its mitochondrial localization upon simultaneously deletion of the first and the second transmembrane domains and FUNDC1 109-118 is critical for FUNDC1-ULK1 colocalization**

(A) MEFs were transfected with scramble or *FUNDC1* siRNA for 24 h. Immunoblotting with FUNDC1 antibody shows the siRNA knockdown efficiency. All results are from 3–4 independent experiments.

(B)-(C) MEFs were transfected with Myc-tagged FUNDC1 and its mutant constructs after the endogenous FUNDC1 was knocked down by siRNA. 24 h post transfection, cells were exposed to hypoxia (1% O<sub>2</sub>) for 6 h. Cells were fixed by 4% paraformaldehyde and stained with anti-Myc (mouse) and anti-ULK1 (rabbit) primary antibodies, then Alexa fluor-488 labeled Donkey anti-Rabbit IgG and Alexa fluor-555 labeled Donkey anti-Mouse IgG secondary antibodies before analysis by immunofluorescence microscopy. Bar, 10 μm. All results are from 3–4 independent experiments.
