# Supplementary material
Source: PubMed Central journal article supplement (PMC4210082)
Supplement: embr0015-0566-sd9.pdf [file embr0015-0566-sd9.pdf]

**Figure S9. Statistics of mitophagy activity of Figure 3**

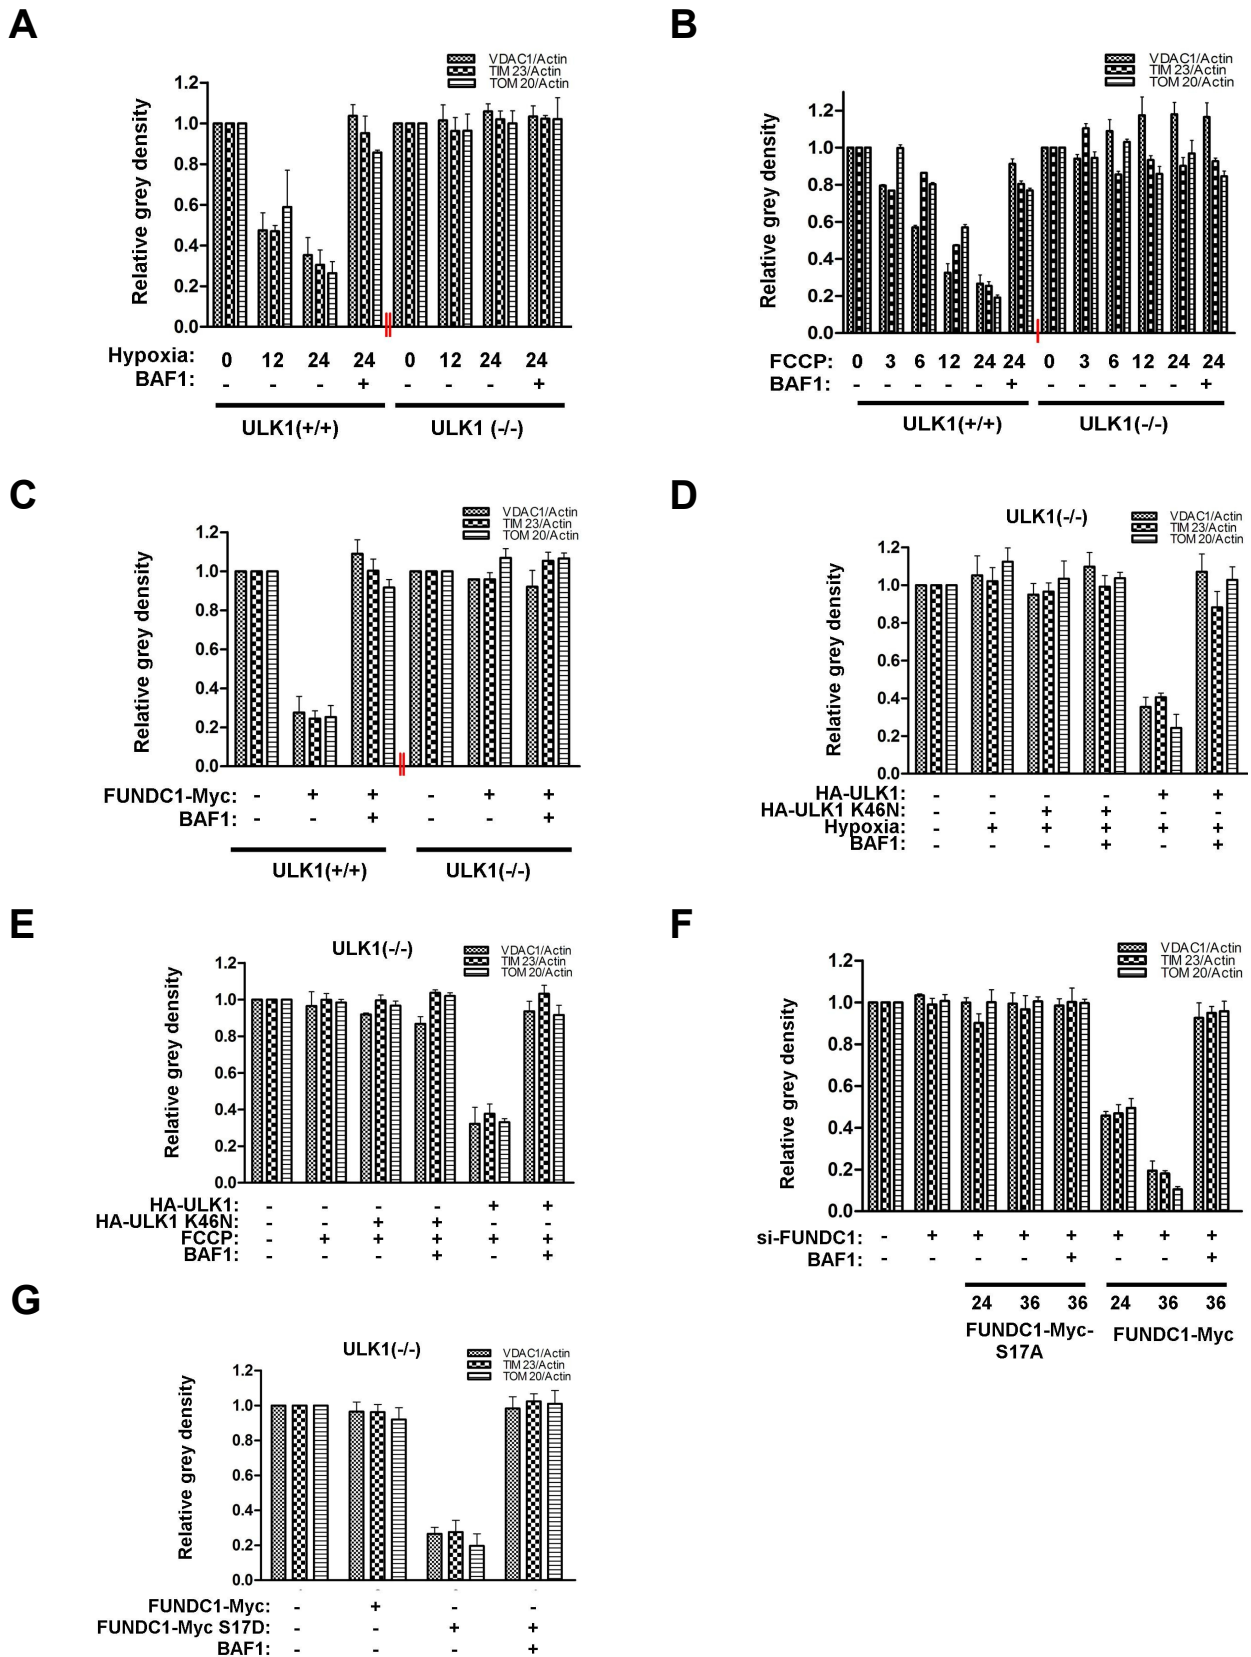

**Figure S9. Statistics of mitophagy activity of Figure 3**

(A) Quantification of the ratio of VDAC1, TIM23 and TOM20/Actin in (Fig 3A)

(B) Quantification of the ratio of VDAC1, TIM23 and TOM20/Actin in (Fig 3B)

(C) Quantification of the ratio of VDAC1, TIM23 and TOM20/Actin in (Fig 3C)

(D) Quantification of the ratio of VDAC1, TIM23 and TOM20/Actin in (Fig 3D)

(E) Quantification of the ratio of VDAC1, TIM23 and TOM20/Actin in (Fig 3E)

(F) Quantification of the ratio of VDAC1, TIM23 and TOM20/Actin in (Fig 3F)

(G) Quantification of the ratio of VDAC1, TIM23 and TOM20/Actin in (Fig 3H)

Data are presented as mean $\pm$ SEM from 3 independent experiments.
