# Supplementary material
Source: PubMed Central journal article supplement (PMC4210082)
Supplement: embr0015-0566-sd10.pdf [file embr0015-0566-sd10.pdf]

**Figure S10. Citrate synthesis activity analysis also reveals that either hypoxia or FCCP is able to induce mitophagy**

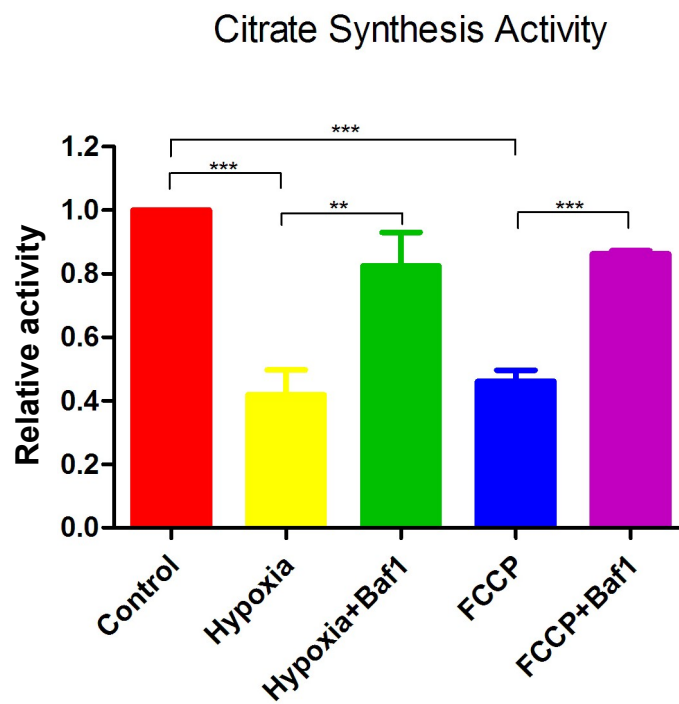

**Figure S10. Citrate synthesis activity analysis also reveals that either hypoxia or FCCP is able to induce mitophagy**

MEFs were cultured under hypoxic (1% O<sub>2</sub>) conditions for 24 h or FCCP (20 μM) for 24 h in absence or presence of 50 nM bafilomycin A1 (BAF1). Cell lysates were detected with the CS activity kit. Data were obtained from three independent experiments. Data are presented as mean±SEM from 3 independent experiments. \*\* P<0.01. \*\*\* P<0.001.
