# Supplementary material
Source: PubMed Central journal article supplement (PMC4210082)
Supplement: embr0015-0566-sd13.pdf [file embr0015-0566-sd13.pdf]

Figure S13. Statistics of mitophagy activity of Figure 4

**A**

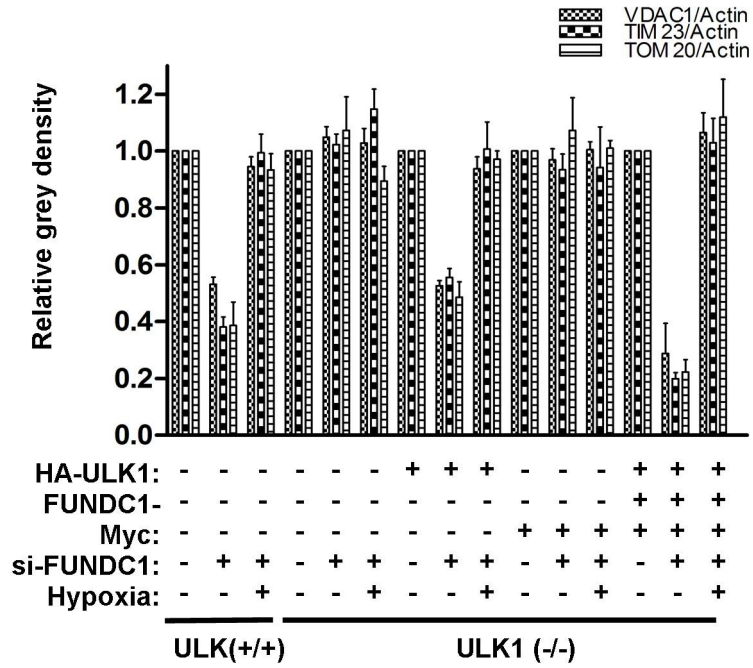

**B**

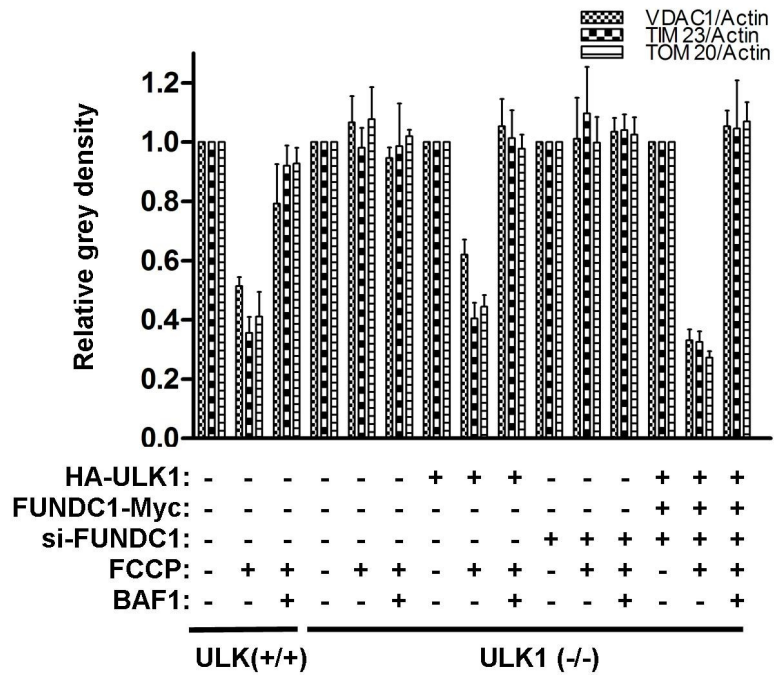

**Figure S13. Statistics of mitophagy activity of Figure 4**

(A) Quantification of the ratio of VDAC1, TIM23 and TOM20/Actin in (Fig 4A). Data are presented as mean $\pm$ SEM from 3 independent experiments.

(B) Quantification of the ratio of VDAC1, TIM23 and TOM20/Actin in (Fig 4B). Data are presented as mean $\pm$ SEM from 3 independent experiments.
