# Supplementary material
Source: PubMed Central journal article supplement (PMC4210082)
Supplement: embr0015-0566-sd14.pdf [file embr0015-0566-sd14.pdf]

**Figure S14. Detailed ImageJ data processing of mitochondrial coverage polled from electron micrographs**

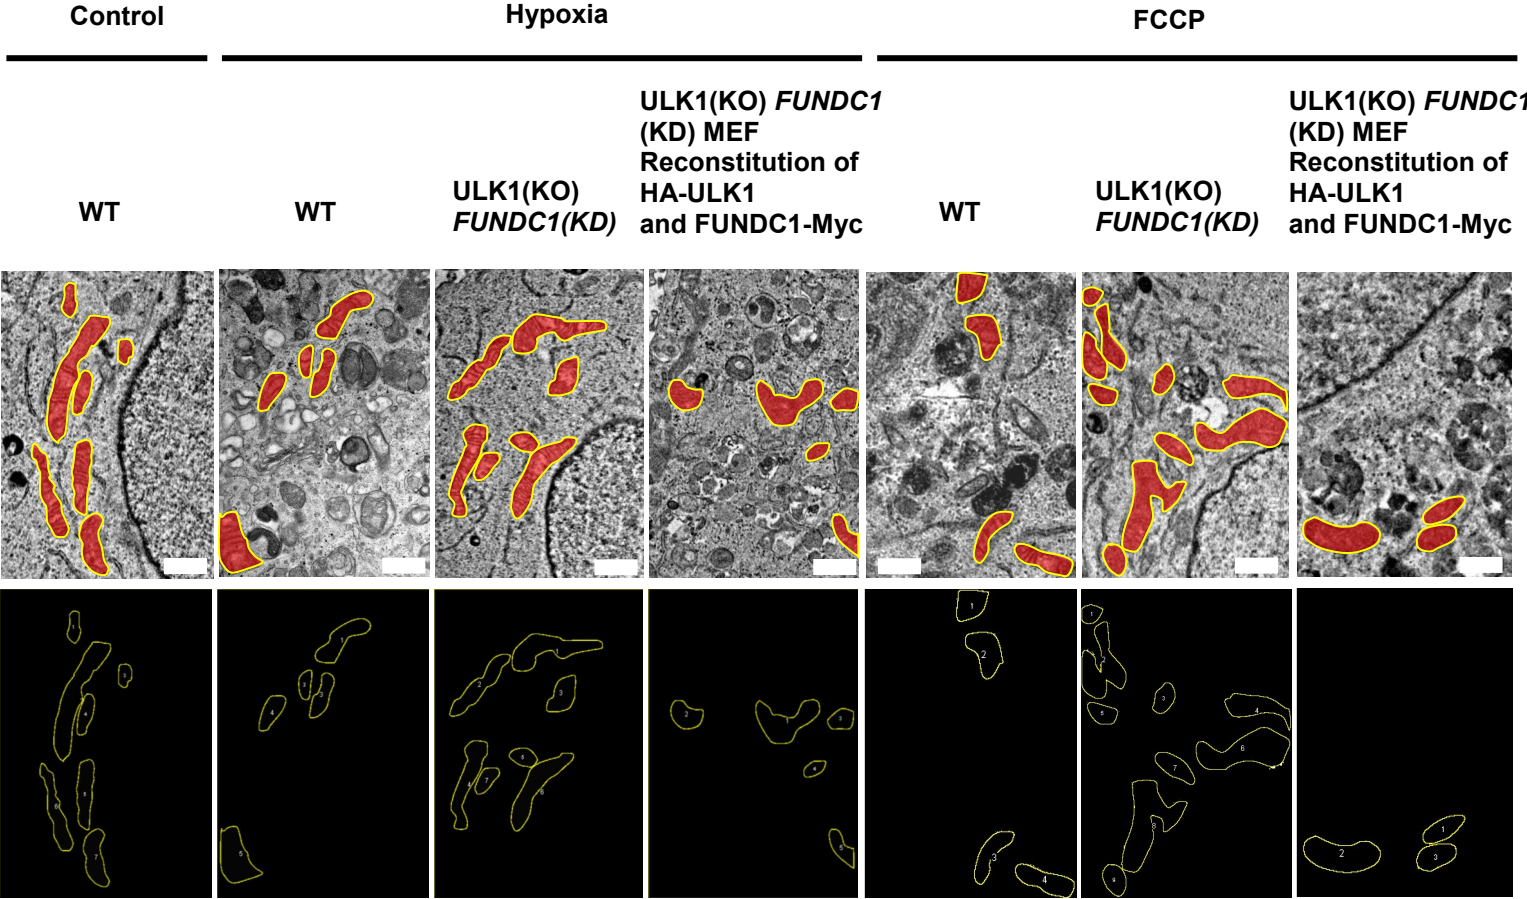

**Figure S14. Detailed ImageJ data processing of mitochondrial coverage polled from electron micrographs**

Randomly selected sections from different cell samples with a visible nucleus were analyzed. Mitochondria profiles were manually traced by a blinded investigator using ImageJ software. All cells were checked three times for consistency. Mitochondria coverage = (the total area of mitochondria / the total cellular areas)  $\times$  100%. Red area enclosed by yellow line denotes mitochondria. Red area enclosed by yellow line is calculated by ImageJ software.
