# Supplementary material
Source: PubMed Central journal article supplement (PMC4210082)

Figure 1A

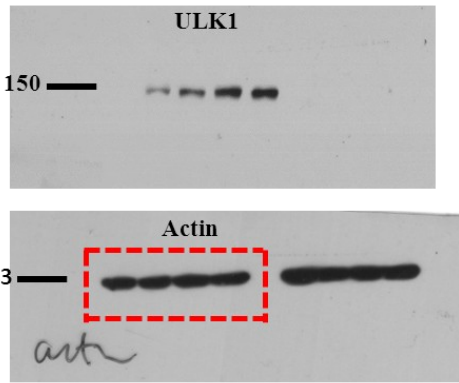

Figure 1C

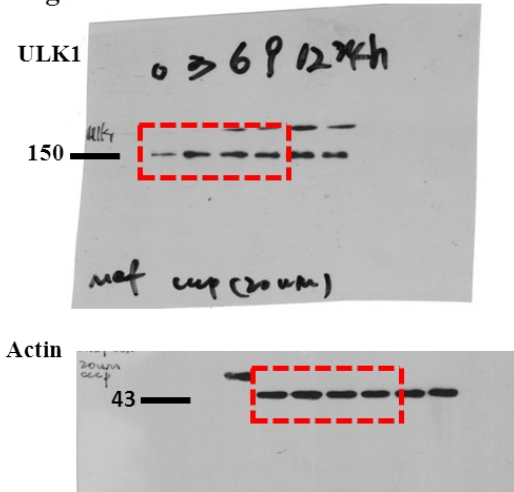

Figure 1G

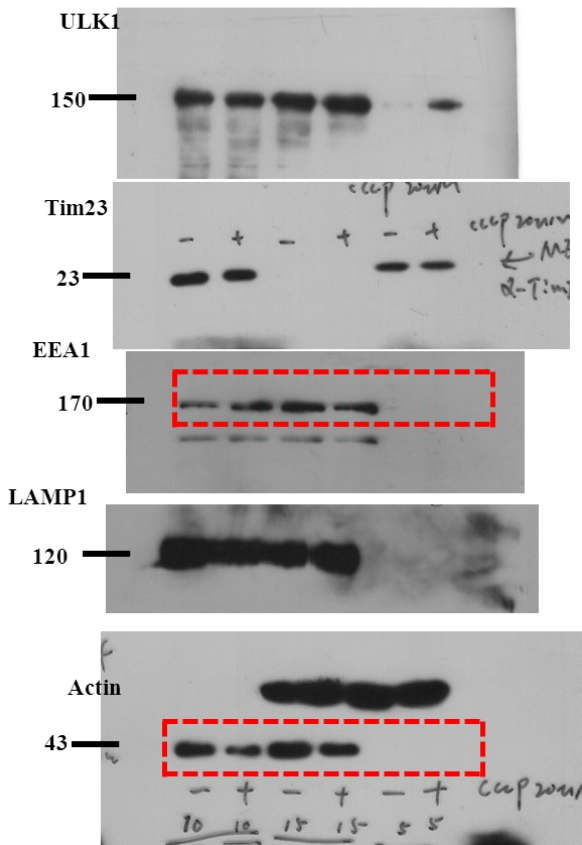

Figure 1F

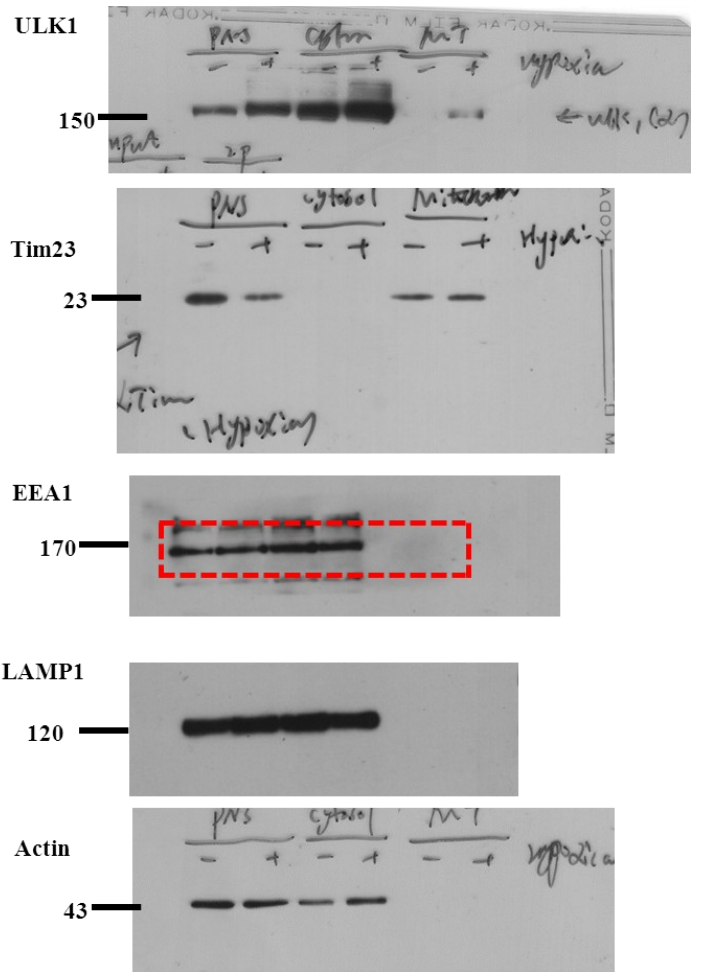

Figure 2A

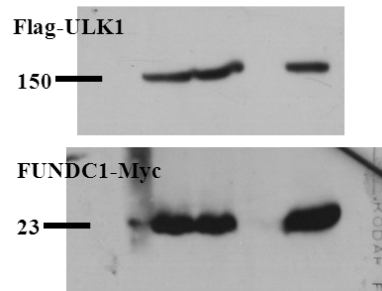

Figure 2B

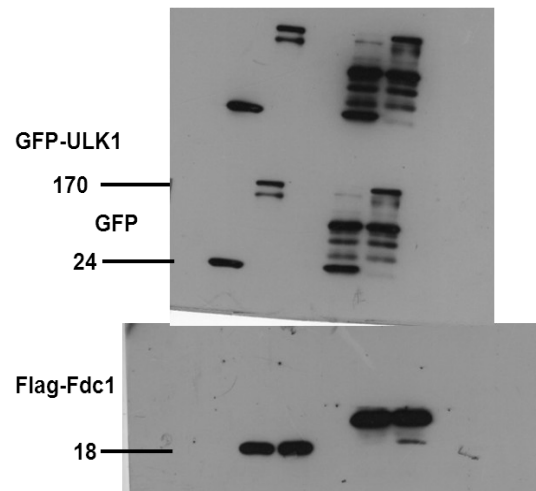

Supplement: embr0015-0566-sd17.pdf [file embr0015-0566-sd17.pdf]

Figure 2K

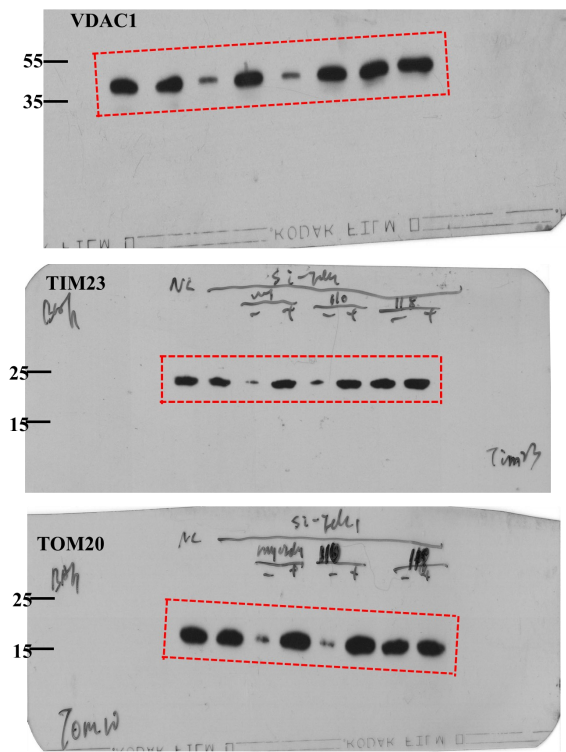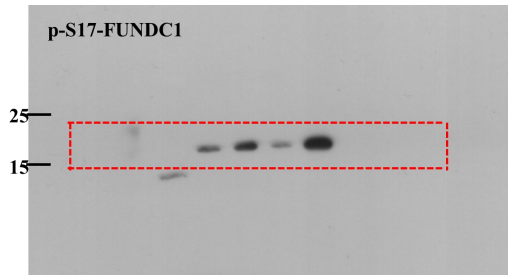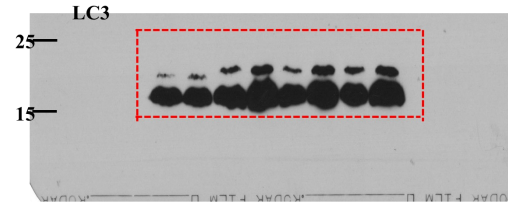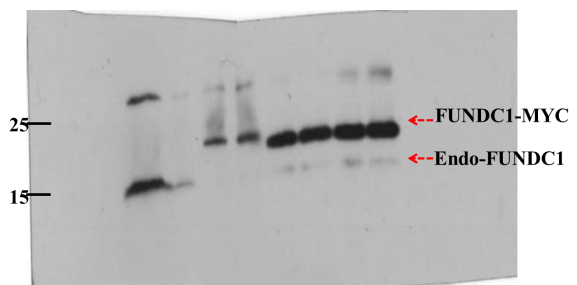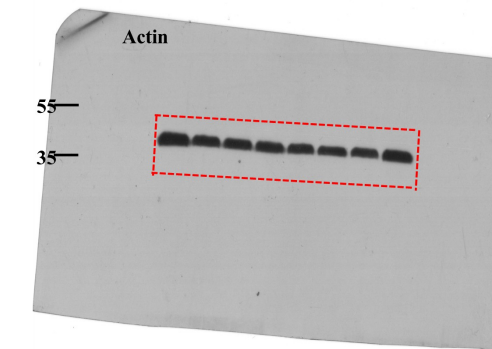

Figure 3A

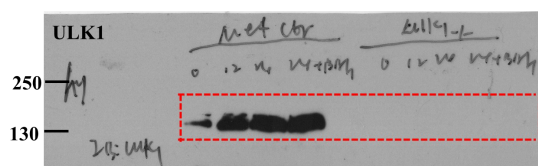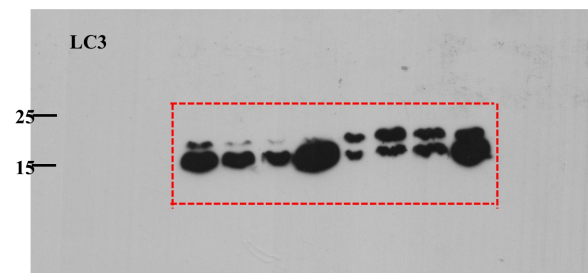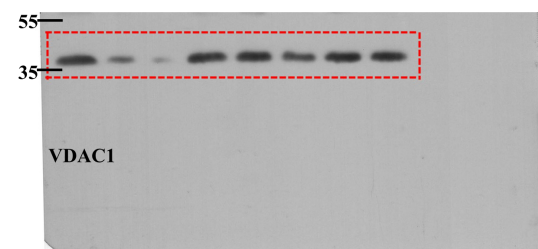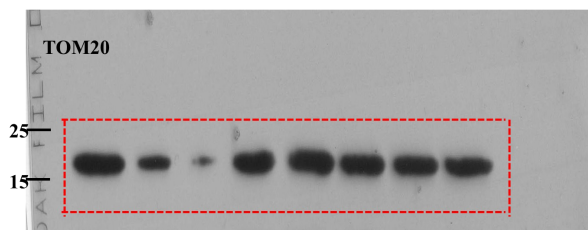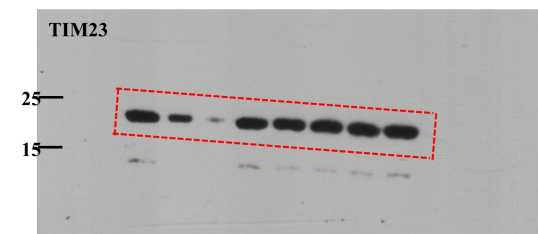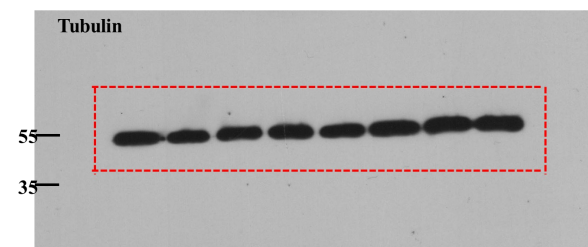

Figure 3B

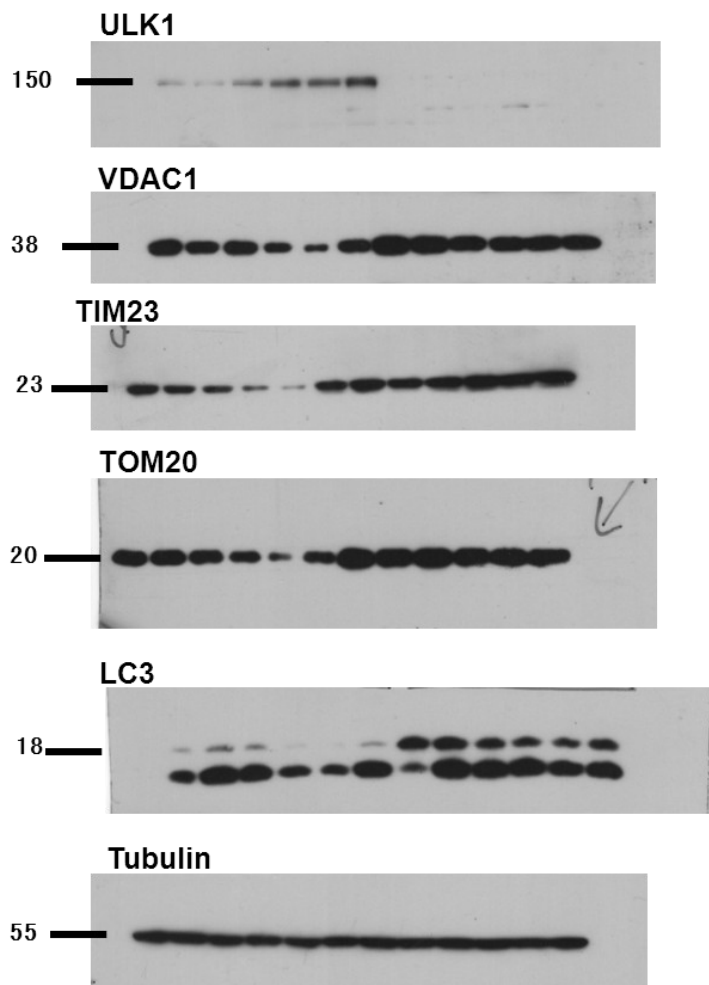

Figure 3C

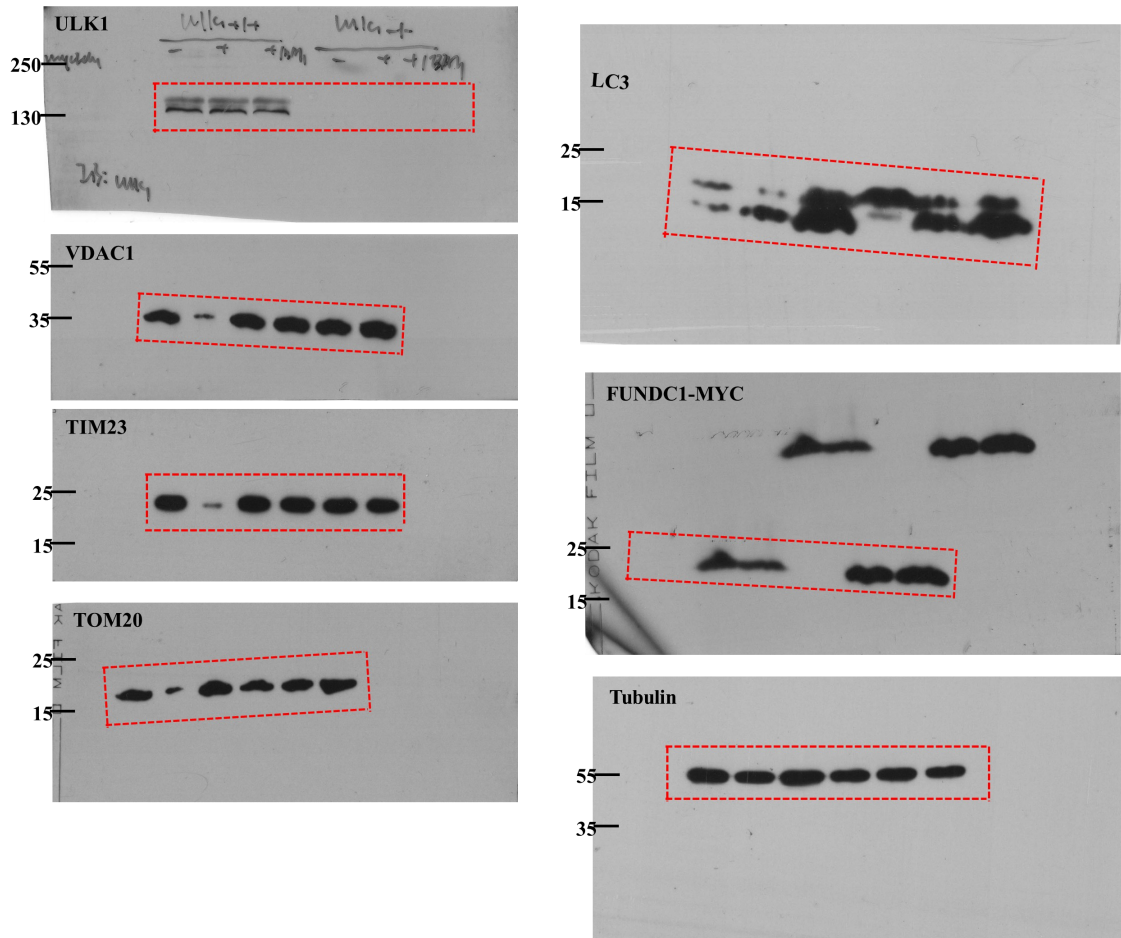

Figure 3D

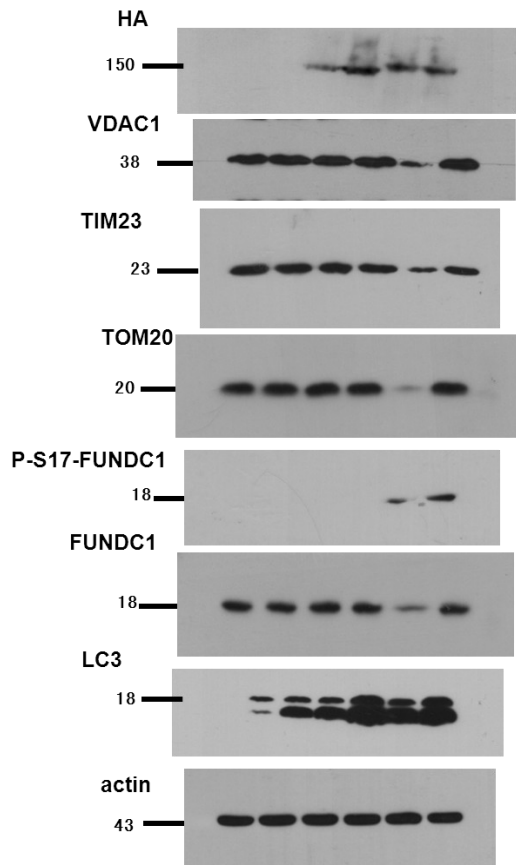

Figure 3E

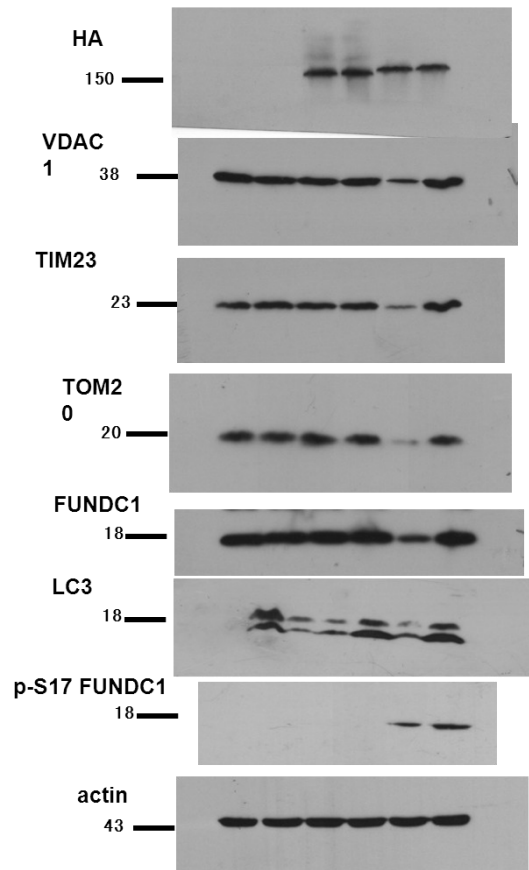

Figure 3H

Figure 3J

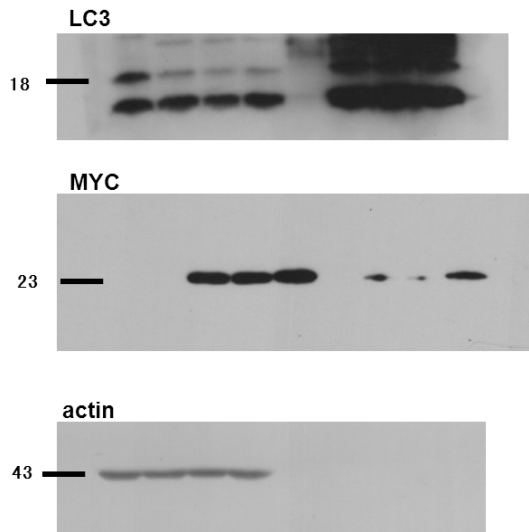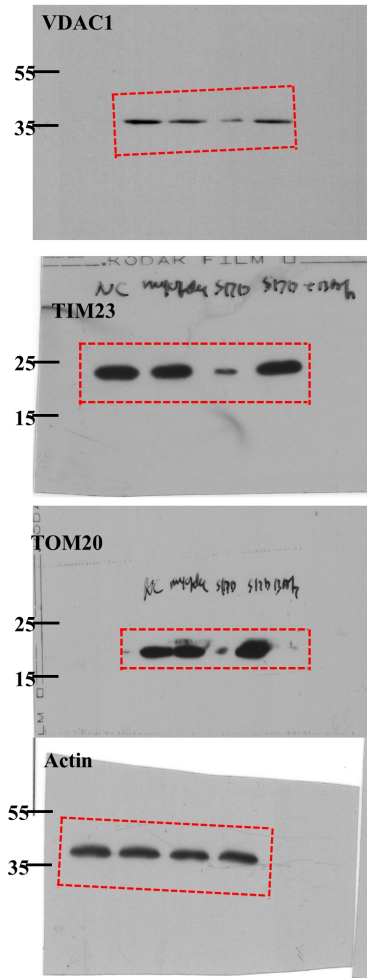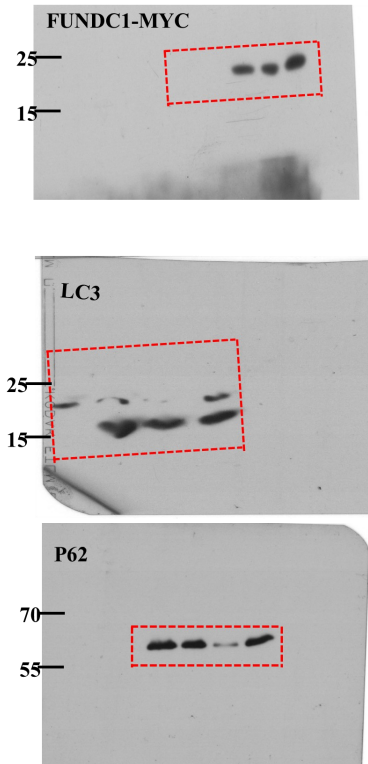

Supplement: embr0015-0566-sd19.pdf [file embr0015-0566-sd19.pdf]

Figure 4B

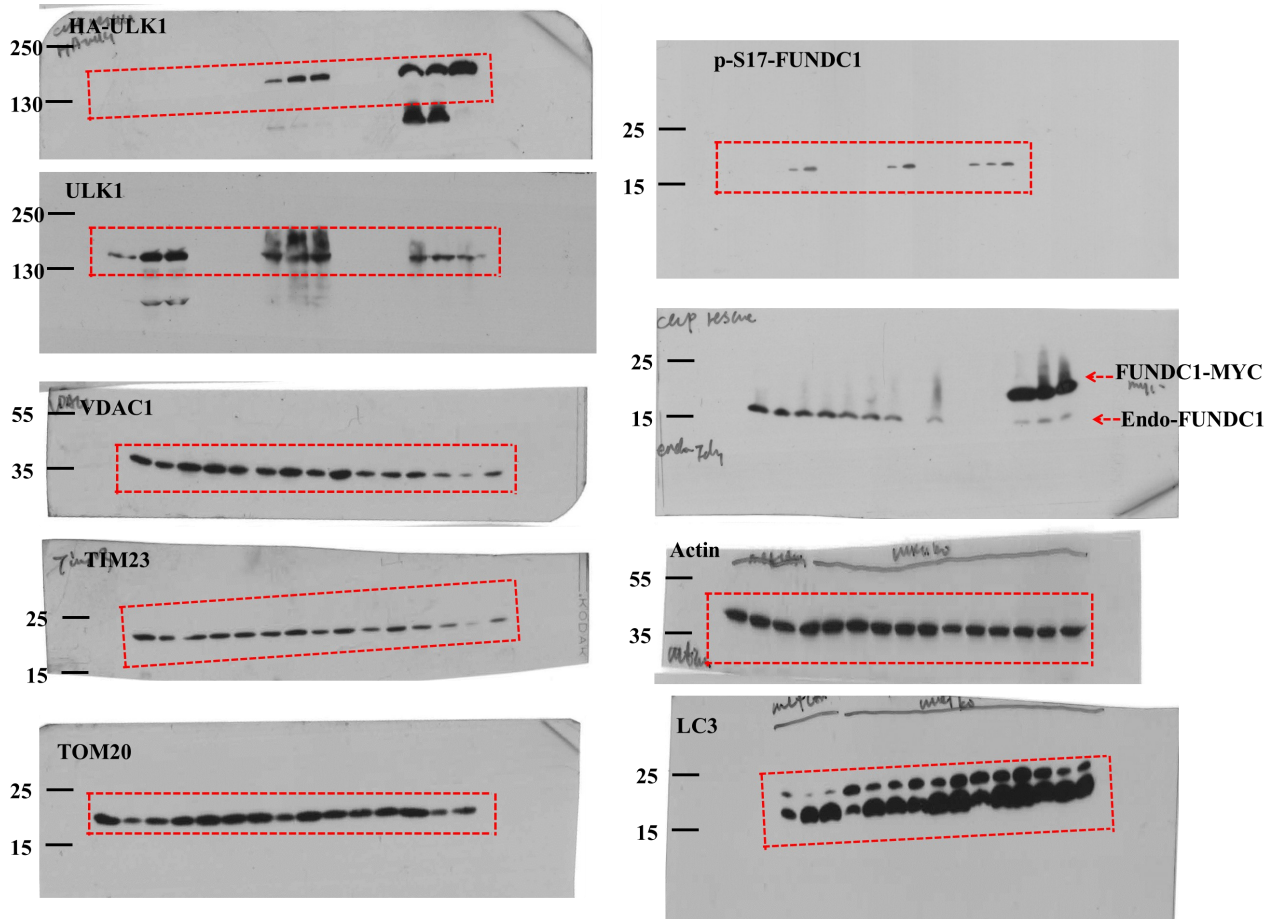

Supplement: embr0015-0566-sd20.pdf [file embr0015-0566-sd20.pdf]
